# Supplementary material for: Review of Clinical Trials on the Effects of Tai Chi Practice on Primary Hypertension: The Current State of Study Design and Quality Control
Source: Hindawi journal article supplement (doi:10.1155/2020/6637489), 2020-01-01
Supplement: f1 [file 6637489.f1.zip]

**Supplementary Table 2.The basic information of the 45 included studies.**

| Study No. | Title                                                                                                                                                                                      | Author Name       | Author Major       | Publish Time | Paper Language | Perform Place |
|-----------|--------------------------------------------------------------------------------------------------------------------------------------------------------------------------------------------|-------------------|--------------------|--------------|----------------|---------------|
| S1        | 太极拳对高血压病人的防治作用                                                                                                                                                                             | Yin J.et al.      | /                  | 1990         | Chinese        | China         |
| S2        | The Effects of Aerobic Exercise and T'ai Chi on Blood Pressure in Older People: Results of a Randomized Trial                                                                              | Deborah RY.et al. | Medicine           | 1999         | English        | USA           |
| S3        | 不同锻炼方式对老年人高血压疗效的研究                                                                                                                                                                         | Wei Y.et al.      | Physical Education | 2003         | Chinese        | China         |
| S4        | The Beneficial Effects of Tai Chi Chuan on Blood Pressure and Lipid Profile and Anxiety Status in a Randomized Controlled Trial                                                            | Tsai JC.et al.    | Nursing            | 2003         | English        | China         |
| S5        | Experimental Research on Shadowboxing Prescription of Middle, Old-aged Hypertensive                                                                                                        | Chen YP.et al.    | Physical Education | 2004         | Chinese        | China         |
| S6        | Effect of Tai Chi exercise on blood pressure, plasma nitrogen monoxidum and endothelin in hypertensive patients                                                                            | Mao HN.et al.     | Physical Education | 2006         | Chinese        | China         |
| S7        | Effects of Taijiquan Exercise on Hypertension Patients' NO Consistency in Plasma, the Activity of RBC Na <sup>+</sup> -K <sup>+</sup> ATPase and Ca <sup>2+</sup> -Mg <sup>2+</sup> ATPase | Chen XX.et al.    | Physical Education | 2006         | Chinese        | China         |
| S8        | 太极拳配合药物治疗原发性高血压的临床研究                                                                                                                                                                       | Luo H             | Medicine           | 2006         | Chinese        | China         |
| S9        | 太极拳运动对中老年人高血压的影响                                                                                                                                                                           | Ge WZ.et al.      | Physical Education | 2006         | Chinese        | China         |
| S10       | Comparison of the effects between Taijiquan and walking exercises on the rehabilitation of hypertension symptoms                                                                           | Wang C.et al.     | Physical Education | 2007         | Chinese        | China         |
| S11       | 太极拳和健身操对老年人高血压疗效之研究                                                                                                                                                                        | Wang Y            | Physical Education | 2007         | Chinese        | China         |
| S12       | Effects of Tai Ji Quan on Blood Pressure and Lipid Profile in Patients with Stage I Essential Hypertension                                                                                 | Zhou SW           | Medicine           | 2007         | Chinese        | China         |

|     |                                                                                                                                                                          |                 |                    |      |         |       |
|-----|--------------------------------------------------------------------------------------------------------------------------------------------------------------------------|-----------------|--------------------|------|---------|-------|
| S13 | 太极拳对原发性高血压患者循环 NO/ET 平衡性的研究                                                                                                                                              | Mao HN.et al.   | Physical Education | 2008 | Chinese | China |
| S14 | Effects of Traditional Sports on Clinical Symptom of Aged Intellectual Patients with Essential Hypertension                                                              | Tang QH         | Physical Education | 2009 | Chinese | China |
| S15 | The effect of shadow boxing exercise on the long-term quality of life in middle-aged and elderly patients with primary hypertension                                      | Han QY.et al.   | Nursing            | 2010 | Chinese | China |
| S16 | Research on the effect of middle-aging and elderly high blood pressure patient' quality of life by practice Taichi                                                       | Sun QQ          | Physical Education | 2010 | Chinese | China |
| S17 | Effects of Taichi Exercises of Various Intensities on Essential Hypertension                                                                                             | Wang XJ.et al.  | Physical Education | 2011 | Chinese | China |
| S18 | 太极拳对原发性高血压患者干预效果研究                                                                                                                                                       | He JH.et al.    | Physical Education | 2011 | Chinese | China |
| S19 | Effect evaluation of Tai Chi on hypertension in Guangzhou Liurong Community                                                                                              | Chen JY.et al.  | Medicine           | 2011 | Chinese | China |
| S20 | 太极拳对高血压患者血压的影响                                                                                                                                                           | Chen ZF.et al.  | Nursing            | 2013 | Chinese | China |
| S21 | Gaseous Signal Molecular Mechanism of Taijiquan's Intervention in Aged Essential Hypertension                                                                            | Xie HJ.et al.   | Physical Education | 2014 | Chinese | China |
| S22 | 太极拳运动对老年高血压的干预效果                                                                                                                                                         | Sun F.et al.    | Physical Education | 2014 | Chinese | China |
| S23 | The effect of Tai Chi Exercise on the elderly patients with hypertension                                                                                                 | Huang RF.et al. | Physical Education | 2014 | Chinese | China |
| S24 | 太极拳运动对社区中老年高血压患者降压效果的观察及其降压机制的探讨                                                                                                                                         | Lu W.et al.     | Physical Education | 2015 | Chinese | China |
| S25 | 同伴太极拳练习对老年高血压患者血压控制的影响                                                                                                                                                   | Wei YH.et al.   | Nursing            | 2015 | Chinese | China |
| S26 | 慢跑结合太极拳对中老年高血压患者的疗效及机制                                                                                                                                                   | Qiu LW.et al.   | Physical Education | 2015 | Chinese | China |
| S27 | Effects of Tai Chi exercise on blood pressure and plasma levels of nitric oxide, carbon monoxide and hydrogen sulfide in real-world patients with essential hypertension | Pan XG.et al.   | Physical Education | 2015 | English | China |

|     |                                                                                                                                                                                                           |              |                    |      |         |       |
|-----|-----------------------------------------------------------------------------------------------------------------------------------------------------------------------------------------------------------|--------------|--------------------|------|---------|-------|
| S28 | Use antihypertensive tai chi gong improve the effective of different TCM constitution in elderly patients with high blood pressure                                                                        | Cui CL       | Physical Education | 2015 | Chinese | China |
| S29 | Community-Based Mind-Body Meditative Tai Chi Program and Its Effects on Improvement of Blood Pressure, Weight, Renal Function, Serum Lipoprotein, and Quality of Life in Chinese Adults With Hypertension | Sun J.et al. | Medicine           | 2015 | English | China |
| S30 | The influence of exercise treatment on type I hypertension of elders                                                                                                                                      | Li CY.et al. | Physical Education | 2016 | Chinese | China |
| S31 | 24 式简化太极拳对高血压患者血压以及生活质量的影响                                                                                                                                                                                | Xu H         | Medicine           | 2016 | Chinese | China |
| S32 | Effects of Taijiquan on 24-hour Dynamic Blood Pressure and Vascular Function in Patients with Primary Mild Hypertension                                                                                   | Jin HL       | Medicine           | 2016 | Chinese | China |
| S33 | The Research Of Blood Pressure Variability And Quality Of Life Effect On Patients With Liver-yang Hyperactivity Type Hypertension By Taijiquan                                                            | Liu WQ       | Medicine           | 2016 | Chinese | China |
| S34 | A Clinical Study :Effect of 24 Movement Form of Tai Chi on Senile Patients with Essential Hypertension                                                                                                    | Zhang DL     | Medicine           | 2017 | Chinese | China |
| S35 | Study on Intervention of Essential Hypertension Group by Tai Chi Combined with Health Management                                                                                                          | Liu J        | Medicine           | 2017 | Chinese | China |
| S36 | 太极拳运动对中老年女性高血压患者的影响                                                                                                                                                                                       | Song YB      | Physical Education | 2018 | Chinese | China |
| S37 | The effect of Tai Chi on sleep quality in elderly patients with essential hypertension                                                                                                                    | Yang XW      | Medicine           | 2018 | Chinese | China |
| S38 | 八式太极拳运动对原发性高血压患者血压水平、血管内皮功能及生活质量的影响                                                                                                                                                                       | Xiao YK      | Physical Education | 2018 | Chinese | China |
| S39 | 太极拳运动对老年高血压患者血压、血液流变学及远期生活质量的影响                                                                                                                                                                           | Liu T.et al. | Physical Education | 2018 | Chinese | China |

|     |                                                                                                                                                                     |                       |                    |      |         |       |
|-----|---------------------------------------------------------------------------------------------------------------------------------------------------------------------|-----------------------|--------------------|------|---------|-------|
| S40 | Tai Chi Exercise is More Effective than Brisk Walking in Reducing Cardiovascular Disease Risk Factors among Adults with Hypertension: A Randomised Controlled Trial | Aileen Chan WK.et al. | Nursing            | 2018 | English | China |
| S41 | The impact of group-based Tai chi on health-status outcomes among community-dwelling older adults with hypertension                                                 | Ma CH.et al.          | Nursing            | 2018 | English | China |
| S42 | Effect of t'ai chi Exercise on Hypertension in Youngand Middle-Aged In-Service Staff                                                                                | Shou XL.et al.        | Medicine           | 2018 | English | China |
| S43 | 24 式太极拳对老年原发性高血压患者降压效果及血脂水平的临床疗效评价                                                                                                                                  | Feng LJ.et al.        | Medicine           | 2018 | Chinese | China |
| S44 | 24 式简化太极拳对老年原发性高血压伴轻度焦虑状态的影响                                                                                                                                        | Wang XB.et al.        | Medicine           | 2019 | Chinese | China |
| S45 | A comparative study of the effects of Taijiquan and walking exercise on physical and mental health of middle-aged and elderly patients with hypertension            | Lin SF.et al.         | Physical Education | 2019 | Chinese | China |
