# Supplementary material for: Review of Clinical Trials on the Effects of Tai Chi Practice on Primary Hypertension: The Current State of Study Design and Quality Control
Source: Hindawi journal article supplement (doi:10.1155/2020/6637489), 2020-01-01
Supplement: f1 [file 6637489.f1.zip]

**Supplementary Table 3.The study design intervention protocol and results of the 45 included studies.**

| Study No. | Study Design |        |             |                     |                      |                                                | Intervention Protocol                                   |        |                                                                |          | Result                                                                                  |                                                 |
|-----------|--------------|--------|-------------|---------------------|----------------------|------------------------------------------------|---------------------------------------------------------|--------|----------------------------------------------------------------|----------|-----------------------------------------------------------------------------------------|-------------------------------------------------|
|           | Participants | Random | Sample Size | Grade               | Intervention Group   | Control Group                                  | Tai Chi Style                                           | Period | Frequency                                                      | Time     | Outcome Measure                                                                         | Conclusion                                      |
| S1        | Patients     | N      | 20          | I/II                | Tai Chi              | Medication                                     | Selectable(Chen / Yang style)                           | 12m    | 2t/day                                                         | 60min    | BP/ Haemoglobinometer / Symptom / Pulse rate                                            | Positive result and superior to medication      |
| S2        | Patients     | Y      | 62          | I                   | Tai Chi              | Exercise (Moderate intensity aerobic exercise) | Yang style 13 form Tai Chi                              | 3m     | 6~7t/w                                                         | 30~60    | BP                                                                                      | Positive result and equal to exercise           |
| S3        | Patients     | N      | 46          | I/II/III            | Tai Chi              | Exercise (walking/jogging)                     | Yang style 24 form Tai Chi                              | 12m    | 5t/w                                                           | 80min    | BP                                                                                      | Positive result and superior to exercise        |
| S4        | Patients     | Y      | 88          | I                   | Tai Chi              | No intervention                                | Yang style 108 form Tai Chi                             | 3m     | 3t/w                                                           | 50min    | BP/Blood lipid/ Emotional state                                                         | Positive result and superior to no intervention |
| S5        | Patients     | N      | 100         | High normal / I /II | Medication & Tai Chi | Medication & Exercise                          | Selectable(Yang style 24 form / 42 form/ 42 form sword) | 5m     | Selectable (30-45 min, 1-2t/day or 45-60 min, every other day) | 30-60min | BP/Pulse                                                                                | Positive result and superior to M&E             |
| S6        | Patients     | Y      | 62          | Undefined           | Medication & Tai Chi | Medication                                     | Yang style 24 form Tai Chi                              | 2m     | 6t/w                                                           | 60min    | BP/NO/ET                                                                                | Positive result and superior to medication      |
| S7        | Patients     | Y      | 40          | II/III              | Medication & Tai Chi | Medication                                     | Chen style Tai Chi                                      | 10w    | 7t/w                                                           | 40min    | BP/NO/Na <sup>+</sup> -K <sup>+</sup> ATPase/ Ca <sup>2+</sup> -Mg <sup>2+</sup> ATPase | Positive result and superior to medication      |
| S8        | Patients     | Y      | 84          | Undefined           | Medication & Tai Chi | Medication                                     | Yang style 24 form Tai Chi                              | 6m     | 7t/w                                                           | 45min    | BP/Hemorheology                                                                         | Positive result and superior to medication      |
| S9        | Patients     | N      | 50          | Undefined           | Medication & Tai Chi | Medication & Exercise (walking/dance.etc.)     | Yang style 24 form Tai Chi                              | 2m     | 7t/w                                                           | 90min    | BP                                                                                      | Positive result and superior to M&E             |
| S10       | Patients     | N      | 126         | High normal /I/II   | Medication & Tai Chi | Medication /Medication & Exercise (walking)    | Yang style 48 form Tai Chi                              | 6m     | 2t/day                                                         | 60min    | BP                                                                                      | Positive result and superior to M&E             |
| S11       | Patients     | N      | 46          | I/II/III            | Tai Chi              | Exercise(body building exercise)               | Undefined                                               | 8m     | 3t/w                                                           | 60min    | BP                                                                                      | Positive result and superior to medication      |

|     |                             |   |     |           |                                                |                                            |                                                        |     |          |           |                                          |                                                  |
|-----|-----------------------------|---|-----|-----------|------------------------------------------------|--------------------------------------------|--------------------------------------------------------|-----|----------|-----------|------------------------------------------|--------------------------------------------------|
| S12 | Patients                    | Y | 120 | I         | Diet control & Tai Chi                         | Diet control                               | Chen style Tai Chi                                     | 3m  | 7t/w     | 60min     | BP/Blood lipid/HR                        | Positive result and superior to diet control     |
| S13 | Patients & healthy subjects | N | 85  | I/II/III  | Tai Chi                                        | Healthy                                    | Undefined                                              | 2m  | 5~6t/w   | ≥30min    | BP/NO/ET                                 | Positive result                                  |
| S14 | Patients                    | Y | 48  | I/II      | Medication & Tai Chi                           | Medication /Medication & Exercise (Qigong) | Selectable (Yang style 24 form or/and 48 form Tai Chi) | 6m  | 3~5t/w   | 30~60min  | BP                                       | Positive result and lower to M&E(Qigong)         |
| S15 | Patients                    | Y | 60  | I/II      | Usual Care& Tai Chi                            | Usual care                                 | Yang style 24 form Tai Chi                             | 3m  | 1~2t/day | Undefined | BP/SF-36                                 | Positive result and superior to usual care       |
| S16 | Patients                    | Y | 80  | I/II      | Tai Chi                                        | No intervention                            | Yang style 24 form Tai Chi                             | 3m  | 6t/w     | 90min     | BP/SF36/Height/Weight/Waistline/Hipline  | Positive result and superior to no intervention  |
| S17 | Patients                    | Y | 41  | I/II      | Tai Chi with moderate intensity/ low intensity | No intervention                            | Yang style 24 form Tai Chi                             | 3m  | 3t/w     | 90min     | BP/Height/Weight/Waist line/HR/RPE       | Positive result and superior to no intervention  |
| S18 | Patients                    | N | 49  | I/II      | Medication & Tai Chi                           | Medication                                 | Selectable (Yang style 24/42/48 form Tai Chi )         | 5m  | 6 t/w    | 40-50min  | BP/ Exercise stress test                 | Positive result and equal to medication          |
| S19 | Patients                    | N | 441 | Undefined | Health education & Tai Chi                     | Healthy education                          | Undefined                                              | 24m | 5t/w     | 60min     | BP                                       | Positive result and equal to health education    |
| S20 | Patients                    | Y | 68  | Undefined | Usual care & Tai Chi                           | Usual care                                 | Yang style 24 form Tai Chi                             | 3m  | 6t/w     | 60min     | BP                                       | Positive result and superior to usual care       |
| S21 | Patients & healthy subjects | Y | 75  | I/II      | Tai Chi                                        | No intervention                            | Yang style 24 form Tai Chi                             | 3m  | 5t/w     | 60min     | BP/NO/H <sub>2</sub> S                   | Positive result and superior to no intervention  |
| S22 | Patients                    | Y | 90  | I/II      | Tai Chi                                        | Healthy education                          | Yang style 24 form Tai Chi                             | 2m  | 7t/w     | 120min    | BP/SAS/SDS/E/NE                          | Positive result and superior to health education |
| S23 | Patients                    | Y | 50  | Undefined | Tai Chi                                        | No intervention                            | Yang style 24 form Tai Chi                             | 2m  | 1-2t/day | 20~30min  | BP/BMI/Weight/GLU/Blood lipid/HR/SAS/SDS | Positive result and superior to no intervention  |

|     |                             |   |     |                   |                                         |                                                          |                                |           |           |                       |                                                  |                                                    |
|-----|-----------------------------|---|-----|-------------------|-----------------------------------------|----------------------------------------------------------|--------------------------------|-----------|-----------|-----------------------|--------------------------------------------------|----------------------------------------------------|
| S24 | Patients                    | N | 25  | I                 | Tai Chi                                 | No intervention                                          | Yang style 24 form Tai Chi     | 2m        | 6t/w      | 60min                 | BP/Height/Weight/Pulse Rate/NO/ET/TG/TC          | Positive result and superior to no intervention    |
| S25 | Patients                    | Y | 84  | Undefined         | Usual care & Tai Chi                    | Usual care                                               | Undefined                      | 12m       | 7t/w      | 30-45min              | BP                                               | Positive result and superior to usual care         |
| S26 | Patients                    | N | 26  | High normal /I/II | Medication & Jogging & Tai Chi          | Medication & Exercise (jogging)                          | Yang style 24 form Tai Chi     | Undefined | 4t/w      | 40-60min              | BP/ Weight/BMI/ WHR                              | Positive result and superior to M&E                |
| S27 | Patients & healthy subjects | N | 56  | I/II              | Usual care & Tai Chi                    | Usual care/ No intervention                              | Yang style 24 form Tai Chi     | 3m        | 6t/w      | 60min                 | BP/GLU/TC/NO/CO                                  | Positive result and superior to usual care         |
| S28 | Patients                    | Y | 60  | I/II              | Tai Chi                                 | No intervention                                          | Yang style Tai Chi Jiangyagong | 6m        | 3t/w      | 60min                 | BP                                               | Positive result and superior to no intervention    |
| S29 | Patients                    | Y | 300 | Undefined         | Tai Chi                                 | Non-drug treatment(reading & learning computer software) | Undefined                      | 12m       | Undefined | Group-3h/w; Home-2h/w | BP/Blood lipid/GLU/Waistline/BMI/Quality of life | Positive result and superior to non-drug treatment |
| S30 | Patients                    | Y | 120 | I                 | Tai Chi                                 | Medication                                               | Chen style Tai Chi             | 2m        | 2t/day    | 40min                 | BP                                               | Positive result and equal to medication            |
| S31 | Patients                    | Y | 60  | Undefined         | Usual care & Tai Chi                    | Usual care                                               | Yang style 24 form Tai Chi     | 2m        | 2t/day    | <30min                | BP/Quality of life                               | Positive result and superior to usual care         |
| S32 | Patients                    | Y | 54  | I                 | Tai Chi                                 | Medication                                               | Yang style 24 form Tai Chi     | 6w        | 7t/w      | 40min                 | 24hBP/ET/NO                                      | Positive result and equal to medication            |
| S33 | Patients                    | Y | 60  | I /II             | Medication & Healthy education& Tai Chi | Medication &Healthy education                            | Yang style 24 form Tai Chi     | 3m        | 5t/w      | 40min                 | 24hBP/ET/NO/ Quality of life                     | Positive result and superior to M&H                |
| S34 | Patients                    | Y | 82  | High normal /I/II | Medication & Healthy education& Tai Chi | Medication & Healthy education& Exercise(walking)        | Yang style 24 form Tai Chi     | 3m        | 3t/w      | 60min                 | BP/ BMI/WHR/ Blood lipid                         | Positive result and superior to M&H&E              |
| S35 | Patients                    | Y | 157 | I/II              | Medication & Healthy education& Tai Chi | Medication & Healthy education                           | Chen style Tai Chi             | 6m        | 2t/day    | 40mīn                 | BP/TG                                            | Positive result and superior to M & H              |

|     |          |   |     |                   |                      |                                                    |                            |                    |                      |                        |                                                       |                                                      |
|-----|----------|---|-----|-------------------|----------------------|----------------------------------------------------|----------------------------|--------------------|----------------------|------------------------|-------------------------------------------------------|------------------------------------------------------|
| S36 | Patients | N | 154 | Undefined         | Medication & Tai Chi | Medication                                         | Undefined                  | 9m                 | 7t/w                 | <120min                | BP/SF-36                                              | Positive result and superior to medication           |
| S37 | Patients | Y | 78  | High normal /I/II | Medication & Tai Chi | Medication & Exercise (jogging)                    | Yang style 24 form Tai Chi | 4m                 | 3t/w                 | 65-75min               | BP/Blood lipid /hsCRP /Quality of life/ GDS/ PSQI/TCD | Positive result and superior to M&E                  |
| S38 | Patients | Y | 84  | Undefined         | Tai Chi              | Exercise                                           | Yang style 8 form Tai Chi  | 3m                 | 5t/w                 | 50min                  | BP/GLU/NO/ET                                          | Positive result and superior to exercise             |
| S39 | Patients | Y | 70  | I /II             | Medication & Tai Chi | Medication                                         | Yang style 24 form Tai Chi | 18m                | 7t/w                 | 40-60min               | BP/ Hemorheology /SF-36                               | Positive result and superior to medication           |
| S40 | Patients | Y | 246 | Undefined         | Tai Chi              | Exercise (brisk walking) /Usual care               | Yang style 24 form Tai Chi | Group-12w;Home-24w | Group-2t/w Home-5t/w | Group-60min Home-30min | BP                                                    | Positive result and superior to exercise             |
| S41 | Patients | Y | 158 | Undefined         | Usual care & Tai Chi | Usual care                                         | Yang style 24 form Tai Chi | 6m                 | 3-5t/w               | 60min                  | BP/BMI/ Waistline                                     | Positive result and superior to usual care           |
| S42 | Patients | Y | 208 | I                 | Usual care & Tai Chi | Usual care                                         | Yang style 24 form Tai Chi | 3m                 | 1-2t/day             | 40-90min               | BP /HR/ Blood lipid /BMI                              | Positive result and superior to usual care           |
| S43 | Patients | Y | 82  | High normal /I/II | Medication & Tai Chi | Medication & Exercise (walking)                    | Yang style 24 form Tai Chi | 3m                 | 3t/w                 | 60min                  | BP/ Blood lipid                                       | Positive result and superior to M&E                  |
| S44 | Patients | Y | 100 | Undefined         | Usual care & Tai Chi | Usual care                                         | Yang style 24 form Tai Chi | 3m                 | 3t/w                 | 40-60 min              | BP/SAS/ /WHOQOL-BREF                                  | Positive result and superior to usual care           |
| S45 | Patients | Y | 41  | I/II              | Usual care & Tai Chi | Usual care & Exercise (brisk walking) / Usual care | Yang style 24 form Tai Chi | 10w                | 5t/w                 | 45-60min               | BP/HR/Physical condition/ RPE/SAS/SDS                 | Positive result and superior to usual care &exercise |
