# Supplementary material for: Review of Clinical Trials on the Effects of Tai Chi Practice on Primary Hypertension: The Current State of Study Design and Quality Control
Source: Hindawi journal article supplement (doi:10.1155/2020/6637489), 2020-01-01
Supplement: f1 [file 6637489.f1.zip]

**Supplementary Table 1. Full search strategy for each of the electronic databases queried.**

| Electronic databases       | Vendor/Platform              | Coverage                                      | Searches strategy                                                                                                                                                                                                                                                                                                                                                        | Hits         |
|----------------------------|------------------------------|-----------------------------------------------|--------------------------------------------------------------------------------------------------------------------------------------------------------------------------------------------------------------------------------------------------------------------------------------------------------------------------------------------------------------------------|--------------|
| PubMed (including MEDLINE) | National Library of Medicine | Date of inception<br>1946 – October 1st, 2020 | <p>(“Tai Ji” OR “Tai Chi” [MeSH Terms] OR “ Tai Ji Quan” OR “T'ai Chi” OR “ Tai Chi Chuan” OR “ Tai-ji”) AND (“hypertension” [MeSH Terms] OR “primary hypertension” OR “Essential hypertension” OR “High Blood Pressure*” OR “Blood Pressure*, High” OR “pre hypertension” OR “borderline hypertension”)</p>                                                             | 59           |
| Excerpta Medica Database   | Elsevier Sci Verse           | Date of inception<br>1974 – October 1st, 2020 | <p>Search #1:<br/> “hypertension” OR “primary hypertension” OR “Essential hypertension” OR “High Blood Pressure” OR “Blood Pressure, High” OR “pre hypertension” OR “borderline hypertension”</p> <p>Search #2:<br/> “Tai Ji” OR “Tai Chi” OR “Tai Ji Quan” OR “T'ai Chi” OR “Tai Chi Chuan” OR “Tai-ji”</p> <p>Then under search history: combined search #1 and #2</p> | 47           |
| The Cochrane Library       | Wiley Online Library         | Date of inception<br>1999 – October 1st, 2020 | <p>Search<br/> #1: “hypertension” #2: “primary hypertension”<br/> #3: “Essential hypertension” #4: “High Blood Pressure”</p>                                                                                                                                                                                                                                             | Trials<br>66 |

|                |                     |                                               |                                                                                                                                                                                                                                                                                                                                                                                                                                                                                                                                                 |
|----------------|---------------------|-----------------------------------------------|-------------------------------------------------------------------------------------------------------------------------------------------------------------------------------------------------------------------------------------------------------------------------------------------------------------------------------------------------------------------------------------------------------------------------------------------------------------------------------------------------------------------------------------------------|
|                |                     |                                               | <p>#5: “Blood Pressure, High” #6: “ Blood Pressures, High”</p> <p>#7: “High Blood Pressures” #8: “pre hypertension”</p> <p>#9: “borderline hypertension”</p> <p>#10: #1 OR #2 OR #3 OR #4 OR #5 OR #6 OR #7 OR #8 OR #9</p> <p>#11 “ Tai Chi” #12 “ Taijiquan” #13 “Tai Ji Quan” #14 “Taiji”</p> <p>#15 “Ji Quan, Tai” #16 “Chi, Tai” #17 “Tai Chi Chuan”</p> <p>#18 “Quan, Tai Ji” #19 “Tai-ji” #20 “T'ai Chi”</p> <p>#21: #11 OR #12 OR #13 OR #14 OR #15 OR #16 OR #17 OR #18 OR</p> <p>#19 OR #20</p> <p>#22: #10 AND #21</p> <p>Trials</p> |
| Web of Science | Clarivate Analytics | Date of inception<br>1950 – October 1st, 2020 | <p>Search #1:</p> <p>“hypertension” OR “primary hypertension” OR “Essential hypertension”</p> <p>OR “High Blood Pressure” OR “Blood Pressure, High” OR “pre</p> <p>hypertension” OR “borderline hypertension”</p> <p>Search #2:</p> <p>“Tai Ji” OR “Tai Chi” OR “Tai Ji Quan” OR “T'ai Chi” OR “Tai Chi</p> <p>Chuan” OR “Tai-ji”</p>                                                                                                                                                                                                           |

|                                                      |                                               |                                                      |     |
|------------------------------------------------------|-----------------------------------------------|------------------------------------------------------|-----|
| Chinese Knowledge<br>Resource Integrated<br>Database | Date of inception<br>1999 – October 1st, 2020 | Then under search history: combined search #1 and #2 |     |
|                                                      |                                               | Search #1 (“高血压”+ “原发性高血压”+“高血压病”+“高血压患者”)           |     |
|                                                      |                                               | Search #2 ( “太极” + “太极拳” + “太极拳运动” +“太极拳锻炼”)         | 318 |
|                                                      |                                               | #1 AND #2                                            |     |
| Wanfang Database                                     | Date of inception<br>1950 – October 1st, 2020 | Search #1 (“高血压”+ “原发性高血压”+ “高血压病”+“高血压患者”)          |     |
|                                                      |                                               | Search #2 (“太极”+ “太极拳”+“太极拳运动”+“太极拳锻炼”)              | 288 |
|                                                      |                                               | #1 AND #2                                            |     |
| China Science and<br>Technology Journal<br>Database  | Date of inception<br>1999 – October 1st, 2020 | Search #1 (“高血压”+ “原发性高血压”+ “高血压病” +“高血压患者”)         |     |
|                                                      |                                               | Search #2 ( “太极”+ “太极拳”+“太极拳运动”+“太极拳锻炼”)             | 158 |
|                                                      |                                               | #1 AND #2                                            |     |

---
