# Supplementary material for: Review of Clinical Trials on the Effects of Tai Chi Practice on Primary Hypertension: The Current State of Study Design and Quality Control
Source: Evid Based Complement Alternat Med. 2020 Dec 30;2020:6637489. doi: 10.1155/2020/6637489 (PMC7787759; doi:10.1155/2020/6637489)
Supplement: Supplementary Materials — Supplementary Table 1: the full search strategy for each of the electronic databases queried, including the electronic databases name, vendor/platform, coverage, searches strategy, and hits number. Supplementary Table 2: the basic information of the 45 included studies, including study number, paper title, author name, author major, publish time, paper language, and author perform place. Supplementary Table 3: the study design, intervention protocol, and results of the 45 included studies, including the study design (participants, whether random, sample size, hypertension grade, intervention group, and control group), intervention protocol (Tai Chi-style, period, frequency, and time), and result (outcome measure and conclusion). [file 6637489.f1.zip]

Archive with 3 entries (3 files):
- 6637489.f1/12.11-Supplementary Table 1.pdf
- 6637489.f1/12.11-Supplementary Table 2.pdf
- 6637489.f1/12.11-Supplementary Table 3.pdf
